# Supplementary material for: Academic-Policy Partnerships in Evidence-Based Practice Implementation and Policy Maker Use of Child Mental Health Research
Source: Atypon-hosted journal article supplement (doi:10.1176/appi.ps.202000582), 2021-06-18
Supplement: appi.ps.202000582.ds001.pdf [file appi.ps.202000582.ds001.pdf]

Table 1. Academic-Policy Partnerships on Implementation Barriers and Use of CMH Research

| <b>Training Academic-Policy Partnerships</b>                                                           |                                       |          |                                           |          |          |
|--------------------------------------------------------------------------------------------------------|---------------------------------------|----------|-------------------------------------------|----------|----------|
| 2015 NRI Survey                                                                                        | Strong Training Partnership<br>(N=10) |          | No/Limited Training<br>Partnership (N=27) |          |          |
| <b>Implementation Barriers</b>                                                                         | <b>N</b>                              | <b>%</b> | <b>N</b>                                  | <b>%</b> | <b>p</b> |
| <i>Shortage of an appropriately trained workforce</i>                                                  |                                       |          |                                           |          | ns       |
| Significant barrier                                                                                    | 7                                     | 70       | 18                                        | 67       |          |
| Not a significant barrier                                                                              | 3                                     | 30       | 9                                         | 33       |          |
| <i>Financing issues in paying for EBPs</i>                                                             |                                       |          |                                           |          | ns       |
| Significant barrier                                                                                    | 7                                     | 70       | 20                                        | 74       |          |
| Not a significant barrier                                                                              | 3                                     | 30       | 7                                         | 26       |          |
| <i>Provider readiness and capacity to implement EBPs</i>                                               |                                       |          |                                           |          | ns       |
| Significant barrier                                                                                    | 7                                     | 70       | 20                                        | 74       |          |
| Not a significant barrier                                                                              | 3                                     | 30       | 7                                         | 26       |          |
| <i>Mismatch of EBP models to specific community needs</i>                                              |                                       |          |                                           |          | ns       |
| Significant barrier                                                                                    | 2                                     | 20       | 5                                         | 19       |          |
| Not a significant barrier                                                                              | 8                                     | 80       | 22                                        | 81       |          |
| <i>Attaining or maintaining fidelity to EBP model standards</i>                                        |                                       |          |                                           |          | ns       |
| Significant barrier                                                                                    | 6                                     | 60       | 18                                        | 67       |          |
| Not a significant barrier                                                                              | 4                                     | 40       | 9                                         | 33       |          |
| <i>Resistance to implementing EBPs from providers/clinicians</i>                                       |                                       |          |                                           |          | ns       |
| Significant barrier                                                                                    | 4                                     | 40       | 6                                         | 22       |          |
| Not a significant barrier                                                                              | 6                                     | 60       | 21                                        | 78       |          |
| 2019 SMHA Survey                                                                                       | Strong Training Partnership<br>(N=10) |          | No/Limited Training<br>Partnership (N=27) |          |          |
| <b>Confidence in skills and knowledge to:</b>                                                          | <b>N</b>                              | <b>%</b> | <b>N</b>                                  | <b>%</b> | <b>p</b> |
| <i>Find CMH research to inform policy or program development</i><br>(Missing data: N=1)                |                                       |          |                                           |          | ns       |
| Confident                                                                                              | 7                                     | 70       | 20                                        | 77       |          |
| Not confident                                                                                          | 3                                     | 30       | 6                                         | 23       |          |
| <i>Evaluate the quality of CMH research</i><br>(Missing data: N=1)                                     |                                       |          |                                           |          | ns       |
| Confident                                                                                              | 8                                     | 80       | 16                                        | 62       |          |
| Not confident                                                                                          | 2                                     | 20       | 10                                        | 38       |          |
| <i>Interpret the results of CMH research</i><br>(Missing data: N=1)                                    |                                       |          |                                           |          | ns       |
| Confident                                                                                              | 6                                     | 60       | 21                                        | 81       |          |
| Not confident                                                                                          | 4                                     | 40       | 5                                         | 19       |          |
| <b>Extent of use of CMH research:</b>                                                                  | <b>N</b>                              | <b>%</b> | <b>N</b>                                  | <b>%</b> | <b>p</b> |
| <i>Use research to help you understand how to think about an issue</i><br>(Missing data: N=2)          |                                       |          |                                           |          | ns       |
| Rarely                                                                                                 | 2                                     | 22       | 7                                         | 27       |          |
| Frequently                                                                                             | 7                                     | 78       | 19                                        | 73       |          |
| <i>Use research to decide about content or direction of a policy or program</i><br>(Missing data: N=2) |                                       |          |                                           |          | ns       |
| Rarely                                                                                                 | 2                                     | 22       | 7                                         | 27       |          |
| Frequently                                                                                             | 7                                     | 78       | 19                                        | 73       |          |

|                                                                                                        |                           |                                 |          |                                     |          |          |
|--------------------------------------------------------------------------------------------------------|---------------------------|---------------------------------|----------|-------------------------------------|----------|----------|
| <i>Use research to persuade others to a point of view or course of action</i><br>(Missing data: N=2)   |                           |                                 |          |                                     |          | ns       |
|                                                                                                        | Rarely                    | 2                               | 22       | 3                                   | 12       |          |
|                                                                                                        | Frequently                | 7                               | 78       | 23                                  | 88       |          |
| <i>Use research because your organization required you to do so</i><br>(Missing data: N=5)             |                           |                                 |          |                                     |          | ns       |
|                                                                                                        | Rarely                    | 7                               | 78       | 17                                  | 74       |          |
|                                                                                                        | Frequently                | 2                               | 22       | 6                                   | 26       |          |
| <b>Barriers to using CMH research</b>                                                                  |                           | <b>N</b>                        | <b>%</b> | <b>N</b>                            | <b>%</b> | <b>p</b> |
| <i>Lack of time to use research</i>                                                                    |                           |                                 |          |                                     |          | 0.009    |
|                                                                                                        | Significant barrier       | 1                               | 10       | 16                                  | 59       |          |
|                                                                                                        | Not a significant barrier | 9                               | 90       | 11                                  | 41       |          |
| <i>Unable to access to research articles</i>                                                           |                           |                                 |          |                                     |          | ns       |
|                                                                                                        | Significant barrier       | 2                               | 20       | 7                                   | 26       |          |
|                                                                                                        | Not a significant barrier | 8                               | 80       | 20                                  | 74       |          |
| <i>The questions that researchers ask are not relevant to the decisions I make</i>                     |                           |                                 |          |                                     |          | ns       |
|                                                                                                        | Significant barrier       | 2                               | 20       | 6                                   | 22       |          |
|                                                                                                        | Not a significant barrier | 8                               | 80       | 21                                  | 78       |          |
| <i>Unclear presentation/communication of research findings</i>                                         |                           |                                 |          |                                     |          | ns       |
|                                                                                                        | Significant barrier       | 5                               | 50       | 6                                   | 22       |          |
|                                                                                                        | Not a significant barrier | 5                               | 50       | 21                                  | 78       |          |
| <i>Lack of interaction or collaboration with researchers</i><br>(Missing data: N=1)                    |                           |                                 |          |                                     |          | ns       |
|                                                                                                        | Significant barrier       | 1                               | 10       | 10                                  | 38       |          |
|                                                                                                        | Not a significant barrier | 9                               | 90       | 16                                  | 62       |          |
| <i>Lack of actionable messages and recommendations in summaries of research</i><br>(Missing data: N=1) |                           |                                 |          |                                     |          | ns       |
|                                                                                                        | Significant barrier       | 4                               | 40       | 9                                   | 35       |          |
|                                                                                                        | Not a significant barrier | 6                               | 60       | 17                                  | 65       |          |
| <i>Limited agency resources</i>                                                                        |                           |                                 |          |                                     |          | ns       |
|                                                                                                        | Significant barrier       | 3                               | 30       | 17                                  | 63       |          |
|                                                                                                        | Not a significant barrier | 7                               | 70       | 10                                  | 37       |          |
| <b>IE Academic-Policy Partnerships</b>                                                                 |                           |                                 |          |                                     |          |          |
| 2015 NRI Survey                                                                                        |                           | Strong IE Partnership<br>(N=21) |          | No/Limited IE Partnership<br>(N=23) |          |          |
| <b>Implementation Barriers</b>                                                                         |                           | <b>N</b>                        | <b>%</b> | <b>N</b>                            | <b>%</b> | <b>p</b> |
| <i>Shortage of an appropriately trained workforce</i>                                                  |                           |                                 |          |                                     |          | ns       |
|                                                                                                        | Significant barrier       | 14                              | 67       | 17                                  | 74       |          |
|                                                                                                        | Not a significant barrier | 7                               | 33       | 6                                   | 26       |          |
| <i>Financing issues in paying for EBPs</i>                                                             |                           |                                 |          |                                     |          | ns       |
|                                                                                                        | Significant barrier       | 14                              | 67       | 20                                  | 87       |          |
|                                                                                                        | Not a significant barrier | 7                               | 33       | 3                                   | 13       |          |
| <i>Provider readiness and capacity to implement EBPs</i>                                               |                           |                                 |          |                                     |          | 0.064    |
|                                                                                                        | Significant barrier       | 12                              | 57       | 19                                  | 83       |          |
|                                                                                                        | Not a significant barrier | 9                               | 43       | 4                                   | 17       |          |
| <i>Mismatch of EBP models to specific community needs</i>                                              |                           |                                 |          |                                     |          | ns       |
|                                                                                                        | Significant barrier       | 3                               | 14       | 4                                   | 17       |          |
|                                                                                                        | Not a significant barrier | 18                              | 86       | 19                                  | 83       |          |
| <i>Attaining or maintaining fidelity to EBP model standards</i>                                        |                           |                                 |          |                                     |          | 0.044    |

|                                                                                                        |                                 |          |                                     |          |                 |
|--------------------------------------------------------------------------------------------------------|---------------------------------|----------|-------------------------------------|----------|-----------------|
| Significant barrier                                                                                    | 17                              | 81       | 12                                  | 52       |                 |
| Not a significant barrier                                                                              | 4                               | 19       | 11                                  | 48       |                 |
| <i>Resistance to implementing EBPs from providers/clinicians</i>                                       |                                 |          |                                     |          | ns              |
| Significant barrier                                                                                    | 5                               | 24       | 5                                   | 22       |                 |
| Not a significant barrier                                                                              | 16                              | 76       | 18                                  | 78       |                 |
| 2019 SMHA Survey                                                                                       | Strong IE Partnership<br>(N=21) |          | No/Limited IE Partnership<br>(N=23) |          |                 |
| <b><i>Confidence in skills and knowledge to:</i></b>                                                   | <b>N</b>                        | <b>%</b> | <b>N</b>                            | <b>%</b> | <b><i>p</i></b> |
| <i>Find CMH research to inform policy or program development</i><br>(Missing data: N=1)                |                                 |          |                                     |          | 0.058           |
| Confident                                                                                              | 18                              | 90       | 15                                  | 65       |                 |
| Not confident                                                                                          | 2                               | 10       | 8                                   | 35       |                 |
| <i>Evaluate the quality of CMH research</i><br>(Missing data: N=1)                                     |                                 |          |                                     |          | ns              |
| Confident                                                                                              | 16                              | 76       | 14                                  | 64       |                 |
| Not confident                                                                                          | 5                               | 24       | 8                                   | 36       |                 |
| <i>Interpret the results of CMH research</i><br>(Missing data: N=1)                                    |                                 |          |                                     |          | 0.058           |
| Confident                                                                                              | 18                              | 90       | 15                                  | 65       |                 |
| Not confident                                                                                          | 2                               | 10       | 8                                   | 35       |                 |
| <b><i>Extent of use of CMH research:</i></b>                                                           | <b>N</b>                        | <b>%</b> | <b>N</b>                            | <b>%</b> | <b><i>p</i></b> |
| <i>Use research to help you understand how to think about an issue</i><br>(Missing data: N=2)          |                                 |          |                                     |          | ns              |
| Rarely                                                                                                 | 3                               | 15       | 6                                   | 27       |                 |
| Frequently                                                                                             | 17                              | 85       | 16                                  | 73       |                 |
| <i>Use research to decide about content or direction of a policy or program</i><br>(Missing data: N=2) |                                 |          |                                     |          | ns              |
| Rarely                                                                                                 | 4                               | 20       | 5                                   | 23       |                 |
| Frequently                                                                                             | 16                              | 80       | 17                                  | 77       |                 |
| <i>Use research to persuade others to a point of view or course of action</i><br>(Missing data: N=2)   |                                 |          |                                     |          | ns              |
| Rarely                                                                                                 | 4                               | 20       | 2                                   | 9        |                 |
| Frequently                                                                                             | 16                              | 80       | 20                                  | 91       |                 |
| <i>Use research because your organization required you to do so</i><br>(Missing data: N=5)             |                                 |          |                                     |          | 0.052           |
| Rarely                                                                                                 | 16                              | 94       | 15                                  | 68       |                 |
| Frequently                                                                                             | 1                               | 6        | 7                                   | 32       |                 |
| <b><i>Barriers to using CMH research</i></b>                                                           | <b>N</b>                        | <b>%</b> | <b>N</b>                            | <b>%</b> | <b><i>p</i></b> |
| <i>Lack of time to use research</i>                                                                    |                                 |          |                                     |          | ns              |
| Significant barrier                                                                                    | 10                              | 48       | 10                                  | 43       |                 |
| Not a significant barrier                                                                              | 11                              | 52       | 13                                  | 57       |                 |
| <i>Unable to access to research articles</i>                                                           |                                 |          |                                     |          | ns              |
| Significant barrier                                                                                    | 4                               | 19       | 8                                   | 35       |                 |
| Not a significant barrier                                                                              | 17                              | 81       | 15                                  | 65       |                 |
| <i>The questions that researchers ask are not relevant to the decisions I make</i>                     |                                 |          |                                     |          | ns              |
| Significant barrier                                                                                    | 4                               | 19       | 6                                   | 26       |                 |
| Not a significant barrier                                                                              | 17                              | 81       | 17                                  | 74       |                 |
| <i>Unclear presentation/ communication of research findings</i>                                        |                                 |          |                                     |          | ns              |
| Significant barrier                                                                                    | 4                               | 19       | 9                                   | 39       |                 |
| Not a significant barrier                                                                              | 17                              | 81       | 14                                  | 61       |                 |

|                                                                                 |    |    |    |    |    |
|---------------------------------------------------------------------------------|----|----|----|----|----|
| <i>Lack of interaction or collaboration with researchers</i>                    |    |    |    |    | ns |
| (Missing data: N=1)                                                             |    |    |    |    |    |
| Significant barrier                                                             | 5  | 24 | 9  | 41 |    |
| Not a significant barrier                                                       | 16 | 76 | 13 | 59 |    |
| <i>Lack of actionable messages and recommendations in summaries of research</i> |    |    |    |    | ns |
| (Missing data: N=1)                                                             |    |    |    |    |    |
| Significant barrier                                                             | 7  | 33 | 10 | 45 |    |
| Not a significant barrier                                                       | 14 | 67 | 12 | 55 |    |
| <i>Limited agency resources</i>                                                 |    |    |    |    | ns |
| Significant barrier                                                             | 9  | 43 | 9  | 39 |    |
| Not a significant barrier                                                       | 12 | 57 | 14 | 61 |    |

ns=not significant
